# Supplementary material for: Correlates of Psychotic Like Experiences among Young Adults during the Covid19 Pandemic across Four Countries
Source: Research Square preprint supplement (doi:10.21203/rs.3.rs-7340400/v1), 2025-11-06
Supplement: Supplementary file 1 [file 6c339e13165d5a7c3e0201a4.docx]

**Supplementary Material**

**1. Assessment Materials**

**1.1. Socio-demographic Data Form, Daily New Covid-19 Cases and Daily New Covid-19-related Deaths**

Data regarding the date of birth, gender, the presence of a diagnosed psychiatric disorder, psychopharmacological medication use, cigarette and alcohol use within the last 30 days, lifetime illicit drug use, the history of SARS-CoV-2 infection, SARS-CoV-2 infection history in close family members, the history of psychiatric disorders in the first-degree relatives were collected. In the day when the participants filled the questionnaire , we get data regarding the number of daily new covid-19 cases and daily new covid-19-related deaths in participant’s country from WHO Covid-19 Dashboard (<https://data.who.int/dashboards/covid19/cases>).

**1.2. The Community Assessment of Psychic Experiences (CAPE)**

CAPE consists of three dimensions: Positive symptoms (20 items), negative symptoms (14 items), and depressive symptoms (8 items) [1]. Only the positive symptoms dimension of the CAPE (CAPE-Pos) was used in the current study. Instead of questions searching for lifetime experiences of PLEs, such as “In your lifetime, have you ever felt as if the thoughts in your head are not your own?”, modified items were applied: “Since March 2020 (Covid-19 outbreak), have you . . . .”[2] reported the meta-analytical reliability of the CAPE as 0.91. CAPE was found valid and reliable in Turkey [3], Spain[4], Nigeria[5], and India [6]. The Cronbach alpha for the CAPE-Pos subscale in the current study was 0.86 for Turkish, 0.78 for Spanish, 0.85 for Nigeria, 0.82 for India. According to k-means algorithm, CAPE score was categorized into three groups: Low CAPE (20-27), Medium CAPE (28-37), High CAPE (38 or more).

**1.3. Patient Health Questionnaire-9 (PHQ-9)**

The PHQ-9, which comprises 9 items scored on a scale of 0 to 3, was utilized to measure depressive symptoms. Higher scores indicate greater symptom severity. The validity and reliability of the PHQ-9 was conducted in Turkey [7], Spain [8], Nigeria [9], and India [10]. The Cronbach alpha for the PHQ in the current study was 0.89 for Spanish, 0.90 for Turkish, 0.91 for Nigeria, 0.92 for India. PHQ scores were grouped into two categories including low PHQ (below 10), high PHQ (10 or more) by k-means algorithm.

**1.4. The Generalized Anxiety Disorder-7 (GAD-7)**

Anxiety symptoms were assessed with the GAD-7, which includes 7 items scored from 0 to 3 each, with total scores ranging from 0 to 21. Higher scores indicate greater symptom severity. The reliability and validity studies of GAD-7 were conducted in Turkey [11], Spain [12], India [10], and Nigeria [13]. The Cronbach alpha for the GAD-7 in the current study was 0.90 for Turkey, 0.91 for Spain, 0.91 for Nigeria, 0.90 for India. The k-means algorithm categorized the GAD-7 score into two groups: Low GAD (below 10) and high GAD (10 or more).

**1.5. Pittsburg Sleep Quality Index (PSQI)**

To measure sleep problems, a self-related questionnaire, the PSQI, was used. The PSQI consists of seven domains including subjective sleep quality, sleep latency, sleep duration, sleep efficiency, daytime dysfunction, sleep fragmentation, and use of sleep aid medications, which altogether to provide a global sleep quality index score. The possible scores range from 0–21, with greater than five indicative of impaired sleep quality. The reliability and validity of the PSQI was conducted in Turkey [14], Spain [15], India [16], and Nigeria [17]. The Cronbach alpha for the PSQI subscale in the current study was 0.78 for Turkey sample, 0.78 for Spanish sample, and 0.79 for Nigerian sample, 0.85 for Indian sample. According to the k-means algorithm, we categorized the PSQI scale into three groups: Low PSQI (0-5), Medium PSQI (6-10), high PSQI (11 or more).

**2. Statistics regarding Association Rule Mining Algorithm**

A data mining analysis was conducted to explore associations within the survey data using Association Rule Mining, a method for uncovering hidden and valuable patterns in large datasets. We employed the Apriori algorithm to identify frequent item sets and generate association rules. The algorithm efficiently prunes infrequent combinations using a minimum support threshold, which also reduces computational cost in large datasets. To avoid the dominance of overly common patterns, the Apriori-Inverse algorithm was also applied, which filters out too frequent item sets using a separate threshold, allowing less obvious but meaningful patterns to emerge in the analysis [18].

First, in the data preparation process, since the rule mining algorithm requires binary transactional data, continuous variables (CAPE, GAD, PSQI, and PQH) were transformed to categorical variables. Thus, each of those numeric variables was categorized by clustering using the k-means algorithm. Then, association rule mining was applied. The rules were evaluated through measures for interestingness, such as confidence and lift [19]. Each set of rules were sorted according to the lift criteria which was detailed in Bayardo-Jr et al. [19] For a rule such as X => Y, Lift(X, Y)>1 signifies that positive correlation among X and Y, while 0<Lift(X,Y)<1 signifies negative correlation among the variables [20].

The rules which contain HIGH_CAPE on the right-hand side were filtered in order to find the patterns which might signify high CAPE scores. Rule mining was repeated for each country separately. After several tests, appropriate thresholds for minimum and maximum support were determined as 2.5% to 40% in our case, while the confidence threshold for rules was set to 40%. While those parameters resulted in a sufficient number of results in Turkey, India and Nigeria; no rules were discovered for Spain that signify high CAPE scores. For this reason, the minimum support thresholds were loosened as 2.0% for Spain. RuleGenerator Software [21] was used to execute the algorithm and obtain association rules.

**References**

1. Stefanis N, Hanssen M, Smirnis N, Avramopoulos D, Evdokimidis I, Stefanis C, et al. Evidence that three dimensions of psychosis have a distribution in the general population. Psychological medicine. 2002;32(2):347–58.

2. Mark W, Toulopoulou T. Psychometric Properties of “Community Assessment of Psychic Experiences”: Review and Meta-analyses. SCHBUL. 2015 Jul 6;sbv088.

3. Sevi O, Ustamehmetoglu F, Gulen M, Zeybek Z. The Reliability and Validity of Community Assessment of Psychic Experiences Scale-Turkish Form. NYS. 2019;(57):15–22.

4. Fonseca-Pedrero E, Lucas-Molina B, Pérez-Albéniz A, Inchausti F, Ortuño-Sierra J. Experiencias psicóticas atenuadas y consumo de cannabis en adolescentes de la población general. Adicciones. 2019 Mar 28;32(1):41.

5. Vermeiden M, Janssens M, Thewissen V, Akinsola E, Peeters S, Reijnders J, et al. Cultural differences in positive psychotic experiences assessed with the Community Assessment of Psychic Experiences-42 (CAPE-42): a comparison of student populations in the Netherlands, Nigeria and Norway. BMC Psychiatry. 2019 Dec;19(1):244.

6. Sahu S, Siddi S, Preti A, Bhatia T, Deshpande SN. Subclinical psychotic symptoms in Indian adults: Application of the Community Assessment of Psychic Experiences (CAPE). Asian Journal of Psychiatry. 2023 Mar;81:103451.

7. Sari YE, Kokoglu B, Balcioglu H, Bilge U, Colak E, Unluoglu I. Turkish reliability of the patient health questionnaire-9. 2016;

8. Diez-Quevedo C, Rangil T, Sanchez-Planell L, Kroenke K, Spitzer RL. Validation and Utility of the Patient Health Questionnaire in Diagnosing Mental Disorders in 1003 General Hospital Spanish Inpatients: Psychosomatic Medicine. 2001 Jul;63(4):679–86.

9. Okeafor IN, Okeafor CU. PHQ-9 Diagnostic Accuracy And Optimal Cut-Off For Depression Among Patients With Stroke In Nigeria. Ann Ib Postgrad Med. 2023 Jun;21(1):11–6.

10. De Man J, Absetz P, Sathish T, Desloge A, Haregu T, Oldenburg B, et al. Are the PHQ-9 and GAD-7 Suitable for Use in India? A Psychometric Analysis. Front Psychol. 2021 May 13;12:676398.

11. Konkan R, Şenormanci Ö, Güçlü O, Aydin E, Z. Sungur M. Yaygın Anksiyete Bozukluğu-7 (YAB-7) Testi Türkçe Uyarlaması, Geçerlik ve Güvenirliği. npa. 2013 Mar 5;50(1):53–8.

12. Garcia-Campayo J, Zamorano E, Ruiz MA, Pardo A, Perez-Paramo M, Lopez-Gomez V, et al. Cultural adaptation into Spanish of the generalized anxiety disorder-7 (GAD-7) scale as a screening tool. Health Qual Life Outcomes. 2010;8(1):8.

13. Victor Mbanuzuru A, Uwakwe R, Sochukwu Anyaoku C, Okwudili Ojimba A, Chinyere Mbanuzuru M, Ezenyeaku CA, et al. Generalized anxiety disorder screening using gad-7 among in-school adolescents of anambra state, nigeria: a comparative study between urban and rural areas. Child Adolesc Psychiatry Ment Health. 2023 Jul 19;17(1):91.

14. Ağargün MY, Kara H, Anlar Ö. The validity and reliability of the Pittsburgh Sleep Quality Index. Turk Psikiyatri Derg. 1996;7(2):107–15.

15. Hita-Contreras F, Martínez-López E, Latorre-Román PA, Garrido F, Santos MA, Martínez-Amat A. Reliability and validity of the Spanish version of the Pittsburgh Sleep Quality Index (PSQI) in patients with fibromyalgia. Rheumatol Int. 2014 Jul;34(7):929–36.

16. Manzar MdD, Moiz JA, Zannat W, Spence DW, Pandi-Perumal SR, BaHammam AS, Hussain ME. Validity of the Pittsburgh Sleep Quality Index in Indian University Students. Oman Med J. 2015 May 15;30(3):193–202.

17. Aloba OO, Adewuya AO, Ola BA, Mapayi BM. Validity of the Pittsburgh Sleep Quality Index (PSQI) among Nigerian university students. Sleep Medicine. 2007 Apr;8(3):266–70.

18. Koh YS, Rountree N. Finding Sporadic Rules Using Apriori-Inverse. In: Ho TB, Cheung D, Liu H, editors. Advances in Knowledge Discovery and Data Mining [Internet]. Berlin, Heidelberg: Springer Berlin Heidelberg; 2005 [cited 2024 Jan 2]. p. 97–106. (Hutchison D, Kanade T, Kittler J, Kleinberg JM, Mattern F, Mitchell JC, Naor M, Nierstrasz O, Pandu Rangan C, Steffen B, Sudan M, Terzopoulos D, Tygar D, Vardi MY, Weikum G, editors. Lecture Notes in Computer Science; vol. 3518). Available from: http://link.springer.com/10.1007/11430919_13

19. Bayardo RJ, Agrawal R. Mining the most interesting rules. In: Proceedings of the fifth ACM SIGKDD international conference on Knowledge discovery and data mining [Internet]. San Diego California USA: ACM; 1999 [cited 2024 Jan 2]. p. 145–54. Available from: https://dl.acm.org/doi/10.1145/312129.312219

20. Lee DG, Ryu KS, Bashir M, Bae JW, Ryu KH. Discovering Medical Knowledge using Association Rule Mining in Young Adults with Acute Myocardial Infarction. J Med Syst. 2013 Apr;37(2):9896.

21. Kabasakal İ. Understanding Shopping Behaviors With Category-and Brand-Level Market Basket Analysis. In: Tools and Techniques for Implementing International E-Trading Tactics for Competitive Advantage. IGI Global; 2020. p. 242–67.

Figure 1. Visualization of the non-linear relationship between the Pittsburg Sleep Questionnaire Index (PSQI) or Daily New Covid-19 related deaths, and Community Assessment of Psychic Experiences (CAPE-Pos)


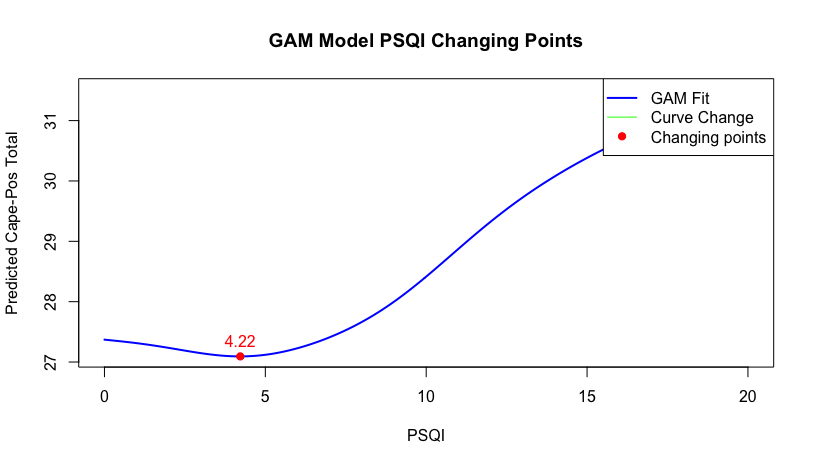

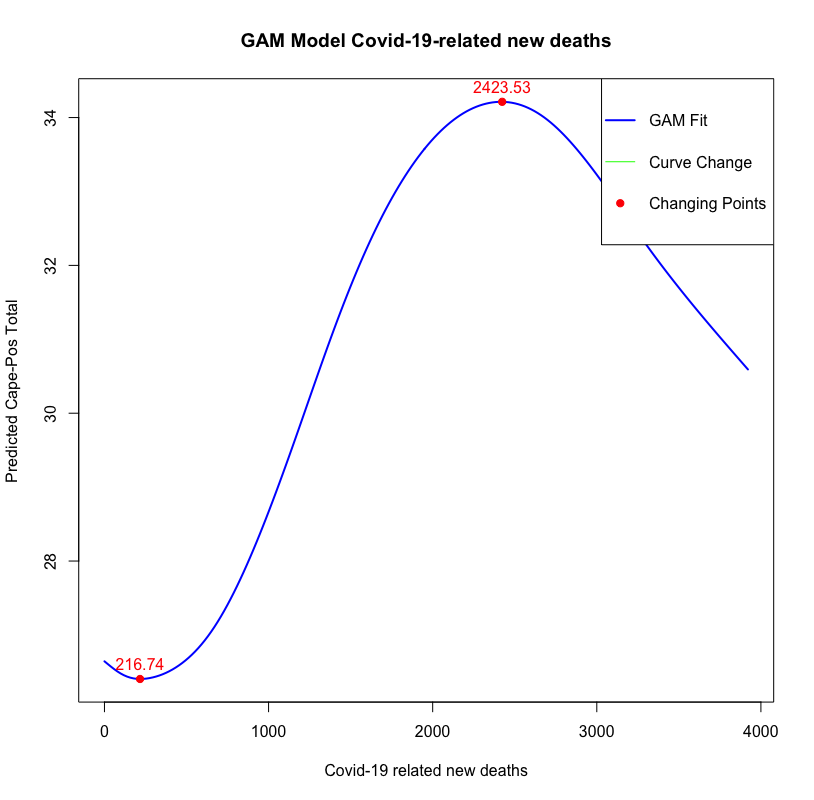


Table 4. The results of association rule mining algorithm

| **TURKEY** | | | | | | | |
| --- | --- | --- | --- | --- | --- | --- | --- |
| **#** | **Association Rule (X🡪Y)** | **{X}** | **{Y}** | **{XY}** | **Support** | **Confidence** | **Lift** |
| 1 | (suicidal thought = yes) & (suicide attempt = yes) 🡪 (psychiatric disorder = yes) & CAPE ∈ [] | 20 | 17 | 8 | 7.60% | 40.00% | 6.19 |
| 2 | (cigarette usage = every day) & (suicidal thought = yes) 🡪 CAPE ∈ [38, 62] | 12 | 38 | 9 | 4.56% | 75.00% | 5.19 |
| 3 | (psychiatric disorder = yes) & (suicide attempt = yes) 🡪 (suicidal thought = yes) & CAPE ∈ [38, 62] | 20 | 21 | 8 | 7.60% | 40.00% | 5.01 |
| 4 | (alcohol usage = 3-5/month) & (suicidal thought = yes) 🡪 CAPE ∈ [38, 62] | 10 | 38 | 7 | 3.80% | 70.00% | 4.84 |
| 5 | (suicidal thought = yes) 🡪 CAPE ∈ [38, 62] | 41 | 38 | 21 | 15.59% | 51.22% | 3.54 |
| **NIGERIA** | | | | | | | |
|  | **Association Rule (X🡪Y)** | **{X}** | **{Y}** | **{XY}** | **Support** | **Confidence** | **Lift** |
| 1 | PSQI ∈ [11, 21] 🡪 CAPE ∈ [38, 62] & PHQ ∈ [10, 27] | 6 | 8 | 3 | 6.19% | 50.00% | 6.06 |
| 2 | (gender = male) & PHQ ∈ [10, 27] 🡪 CAPE ∈ [38, 62] | 5 | 10 | 3 | 5.15% | 60.00% | 5.82 |
| 3 | PHQ ∈ [10, 27] & PSQI ∈ [11, 21] 🡪 CAPE ∈ [38, 62] | 5 | 10 | 3 | 5.15% | 60.00% | 5.82 |
| 4 | PSQI ∈ [11, 21] 🡪 CAPE ∈ [38, 62] | 6 | 10 | 3 | 6.19% | 50.00% | 4.85 |
| 5 | (psychiatric disorder = yes) & PHQ ∈ [10, 27] & GAD ∈ [10, 21] 🡪 CAPE ∈ [38, 62] | 9 | 10 | 4 | 9.28% | 44.44% | 4.31 |
| 6 | (psychiatric disorder = yes) & PHQ ∈ [10, 27] 🡪 CAPE ∈ [38, 62] | 14 | 10 | 6 | 14.43% | 42.86% | 4.16 |
| **INDIA** | | | | | | | |
|  | **Association Rule (X🡪Y)** | **{X}** | **{Y}** | **{XY}** | **Support** | **Confidence** | **Lift** |
| 1 | (psychiatric disorder = yes) & (suicidal thought = yes) & PSQI ∈ [11, 21] 🡪 CAPE ∈ [38, 62] | 11 | 56 | 9 | 3.12% | 81.82% | 5.16 |
| 2 | (suicidal thought = yes) & PSQI ∈ [11, 21] 🡪 CAPE ∈ [38, 62] | 23 | 56 | 15 | 6.52% | 65.22% | 4.11 |
| 3 | (suicide attempt = yes) & PSQI ∈ [11, 21] 🡪 CAPE ∈ [38, 62] | 16 | 56 | 9 | 4.53% | 56.25% | 3.55 |
| 4 | (psychiatric disorder = yes) & PSQI ∈ [11, 21] 🡪 CAPE ∈ [38, 62] | 25 | 56 | 13 | 7.08% | 52.00% | 3.28 |
| 5 | PSQI ∈ [11, 21] 🡪 CAPE ∈ [38, 62] | 46 | 56 | 22 | 13.03% | 47.83% | 3.01 |
| **SPAIN** | | | | | | | |
|  | **Association Rule (X🡪Y)** | **{X}** | **{Y}** | **{XY}** | **Support** | **Confidence** | **Lift** |
| 1 | (psychopharmacological treatment = yes) 🡪 CAPE ∈ [38, 62] | 8 | 5 | 3 | 6.02% | 37.50% | 9.98 |
| 2 | PSQI ∈ [11, 21] 🡪 CAPE ∈ [38, 62] | 10 | 5 | 3 | 7.52% | 30.00% | 7.98 |
| 3 | (COVID in family = yes) & GAD ∈ [10, 21] 🡪 CAPE ∈ [38, 62] & PHQ ∈ [10, 27] | 17 | 3 | 3 | 12.78% | 17.65% | 7.82 |
| 4 | (COVID in family = yes) & PHQ ∈ [10, 27] 🡪 CAPE ∈ [38, 62] & GAD ∈ [10, 21] | 18 | 3 | 3 | 13.53% | 16.67% | 7.39 |
| 5 | PHQ ∈ [10, 27] & GAD ∈ [10, 21] 🡪 (COVID in family = yes) & CAPE ∈ [38, 62] | 21 | 3 | 3 | 15.79% | 14.29% | 6.33 |
| 6 | (COVID in family = yes) & PHQ ∈ [10, 27] & GAD ∈ [10, 21] 🡪 CAPE ∈ [38, 62] | 13 | 5 | 3 | 9.77% | 23.08% | 6.14 |
| 7 | GAD ∈ [10, 21] 🡪 (COVID in family = yes) & CAPE ∈ [38, 62] & PHQ ∈ [10, 27] | 28 | 3 | 3 | 21.05% | 10.71% | 4.75 |
| 8 | GAD ∈ [10, 21] 🡪 CAPE ∈ [38, 62] & PHQ ∈ [10, 27] | 28 | 3 | 3 | 21.05% | 10.71% | 4.75 |
| 9 | GAD ∈ [10, 21] 🡪 (COVID in family = yes) & CAPE ∈ [38, 62] | 28 | 3 | 3 | 21.05% | 10.71% | 4.75 |
| 10 | (COVID in family = yes) & GAD ∈ [10, 21] 🡪 CAPE ∈ [38, 62] | 17 | 5 | 3 | 12.78% | 17.65% | 4.69 |

CAPE-Pos: Community Assessment of Psychic Experiences, Positive subscale; PHQ: Patient Health Questionnaire; GAD: Generalized Anxiety Disorder; PSQI: Pittsburg Sleep Quality Index.
